# Supplementary material
Source: Springer Nature journal article supplement (https://www.springermedizin.de/resource/supplementary/12974_2010_227_MOESM4_ESM.pdf/9601036)

# 1 h MCAO / 48h reperfusion

CD59a-KO

WT

Hoechst stain

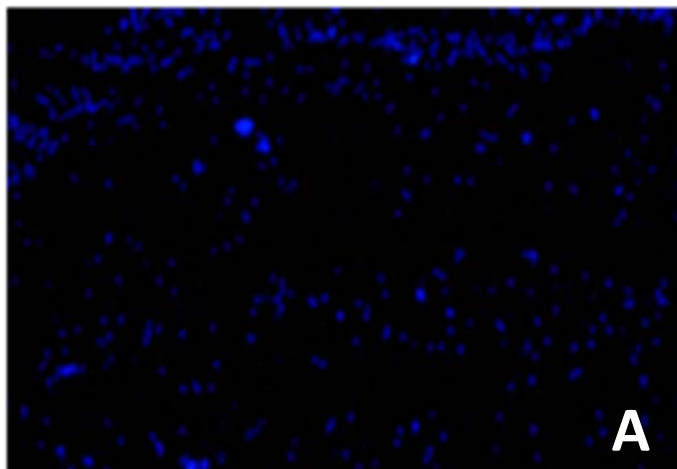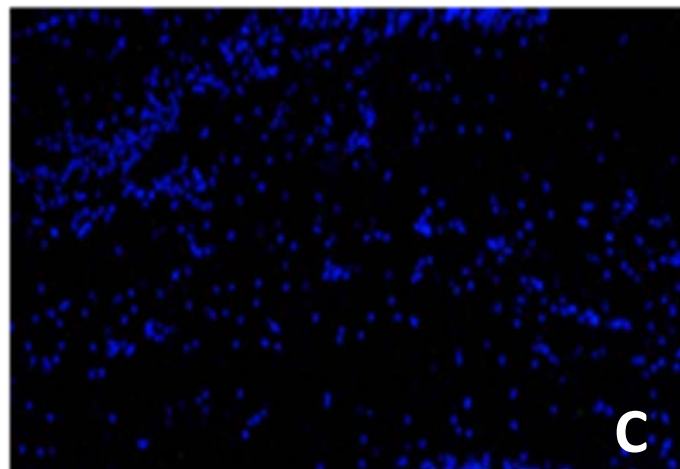

TUNEL stain

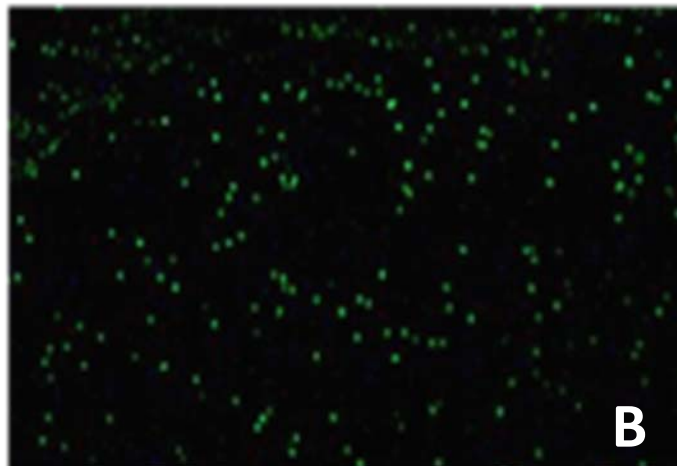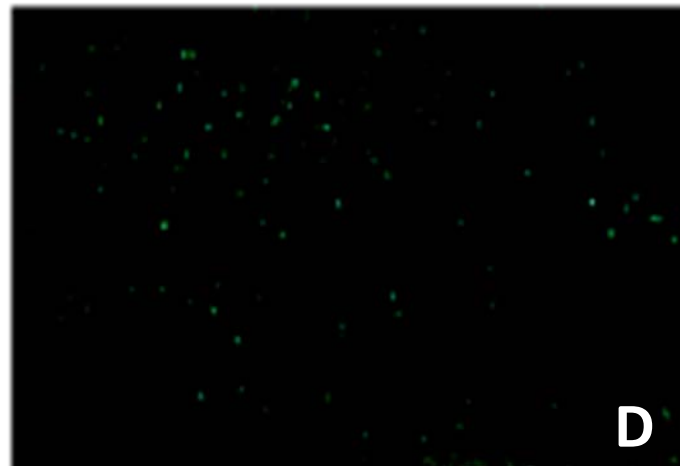

Supplement: MOESM4 [file 9601036]
